# Supplementary material for: Readmission Risk Trajectories for Patients With Heart Failure Using a Dynamic Prediction Approach: Retrospective Study
Source: PubMed Central journal article supplement (PMC6781727; doi:10.2196/14756), 2019-09-16
Supplement: medinform_v7i3e14756_app1.pdf [file medinform_v7i3e14756_app1.pdf]

Example of the daily data (patient-day data) used in the second stage model.

| Encounter ID | Age | Minimal hemoglobin (gm/dl) | ... | Elapsed Length of stay (days) | Estimated counterfactual daily readmission risk |
|--------------|-----|----------------------------|-----|-------------------------------|-------------------------------------------------|
| 1            | 91  | 13.8                       | ... | 0                             | 0.12                                            |
| 1            | 91  | 13.8                       | ... | 1                             | 0.09                                            |
| 1            | 91  | 11.3                       | ... | 2                             | 0.07                                            |
| 1            | 91  | 10.8                       | ... | 3                             | 0.06                                            |
| 1            | 91  | 10.6                       | ... | 4                             | 0.04                                            |
| 1            | 91  | 10.2                       | ... | 5                             | 0.02                                            |
| 1            | 91  | 10.2                       | ... | 5.5                           | 0.01                                            |
| 2            | 60  | 10.6                       | ... | 0                             | 0.16                                            |
| 2            | 60  | 10.5                       | ... | 1                             | 0.18                                            |
| 2            | 60  | 9.9                        | ... | 1.7                           | 0.18                                            |
| ⋮            | ⋮   | ⋮                          | ⋮   | ⋮                             | ⋮                                               |
| 534          | 80  | 14.3                       | ... | 0                             | 0.85                                            |
| 534          | 80  | 12.9                       | ... | 1                             | 0.79                                            |
| 534          | 80  | 12.9                       | ... | 1.9                           | 0.75                                            |
