# Supplementary material for: Readmission Risk Trajectories for Patients With Heart Failure Using a Dynamic Prediction Approach: Retrospective Study
Source: PubMed Central journal article supplement (PMC6781727; doi:10.2196/14756), 2019-09-16
Supplement: medinform_v7i3e14756_app2.pdf [file medinform_v7i3e14756_app2.pdf]

---

**Algorithm 1. Steps for the entire modeling process**

---

1. Obtain the full dataset in the format of **Error! Reference source not found.**
2. Fit the full dataset with an optimal set of selected predictors into a logistic regression model and obtain the estimated model parameter  $\hat{\beta}$  using maximum likelihood estimation.

$$\text{Logistic regression model: } p(y = 1|X, \beta) = \frac{1}{1 + e^{-\beta^T X}}$$

where  $y$  is the ‘30-day readmission’ outcome,  $X$  is the vector of predictors in the full dataset (row in **Error! Reference source not found.** excluding encounter ID and readmission outcome)

3. Obtain the daily data in the format of **Error! Not a valid bookmark self-reference.**
4. Estimate the counterfactual daily readmission risk for each patient-day (row of **Error! Not a valid bookmark self-reference.**) using the trained logistic regression from the first stage and daily data in **Error! Not a valid bookmark self-reference.:**

$$p(\text{counterfactual daily readmission risk}|X, \hat{\beta}) = \frac{1}{1 + e^{-\hat{\beta}^T X}}$$

where  $X$  is the vector of predictors in the daily data (row in **Error! Not a valid bookmark self-reference.** excluding encounter ID and readmission risk outcome)

5. Fit the daily data in **Error! Not a valid bookmark self-reference.** into a beta regression model and obtain the estimated model parameters  $\hat{\gamma}, \hat{\phi}$  using maximum likelihood estimation

$$\text{Beta regression model: } p(y|\mu, \phi) = \frac{\Gamma(\phi)}{\Gamma(\mu\phi)\Gamma((1-\mu)\phi)} y^{\mu\phi-1} (1-y)^{(1-\mu)\phi-1}$$

where  $\mu = \frac{1}{1 + e^{-\gamma^T X}}$ ,  $y$  is the estimated counterfactual daily readmission risk outcome from step 2, and  $X$  is a vector of predictors in the daily data (row in **Error! Not a valid bookmark self-reference.** excluding encounter ID and readmission risk outcome)

6. Assemble the time series of daily readmission risk predicted by the beta regression model trained in step 5 for each patient
  7. Apply the K-means clustering algorithm to cluster patients into groups based on their respective time series trajectories of daily readmission risk
  8. Apply Kruskal-Wallis test to identify discriminative predictors associated with the different patient groups identified in step 7
-

---

9. Analyze how the above discriminative predictors change with time and are associated with different readmission risk patterns.

---
