# Supplementary material for: Readmission Risk Trajectories for Patients With Heart Failure Using a Dynamic Prediction Approach: Retrospective Study
Source: PubMed Central journal article supplement (PMC6781727; doi:10.2196/14756), 2019-09-16
Supplement: medinform_v7i3e14756_app3.pdf [file medinform_v7i3e14756_app3.pdf]

Relevant categories of features (57 total) selected using logistic regression and backward feature elimination

| <b>Categories</b>                             | <b>Features</b>                                                                   |
|-----------------------------------------------|-----------------------------------------------------------------------------------|
| <b>Administrative</b>                         | Discharge destination: Charlestown Community Inc (SNF MD ONLY)                    |
|                                               | Discharge destination: Ellicott City Health & Rehabilitation Center (SNF MD ONLY) |
|                                               | Discharge destination Future Care Pineview (SNF MD ONLY)                          |
|                                               | Discharge destination other Maryland skilled nursing facility (SNF MD ONLY)       |
|                                               | Discharge disposition: Intermediate Care Facility                                 |
|                                               | Discharge disposition: nursing facility                                           |
|                                               | Discharge disposition: rehab unit - other acute hospitals                         |
|                                               | Insurance                                                                         |
|                                               | Number of index diagnose                                                          |
|                                               | ZIP 21044                                                                         |
|                                               | Count of prior hospital visits                                                    |
| <b>Alanine transaminase</b>                   | Average absolute change ALT (Units/L)                                             |
|                                               | Average of last 3 ALT (Units/L)                                                   |
|                                               | Maximal ALT (Units/L)                                                             |
| <b>Aspartate transaminase</b>                 | Average absolute change AST (Units/L)                                             |
|                                               | Average AST (Units/L)                                                             |
|                                               | First minus last AST (Units/L)                                                    |
|                                               | Minimal AST (Units/L)                                                             |
| <b>Peripheral capillary oxygen saturation</b> | Average of last 3 SPO2                                                            |
|                                               | Number of measurement SPO2                                                        |
| <b>Sodium</b>                                 | Average absolute change sodium (mmol/L)                                           |
|                                               | Average sodium (mmol/L)                                                           |

|                                 |                                                         |
|---------------------------------|---------------------------------------------------------|
|                                 | Minimal sodium (mmol/L)                                 |
|                                 | Normalized location of minimal sodium (mmol/L)          |
|                                 | Number of measurement sodium (mmol/L)                   |
| <b>Creatinine</b>               | First minus last creatinine (mg/dL)                     |
| <b>Blood urea nitrogen</b>      | First minus last BUN (mg/dL)                            |
| <b>PROBNP</b>                   | Normalized location of maximal PROBNP (pg/mL)           |
|                                 | Number of measurement PROBNP (pg/mL)                    |
| <b>Hemoglobin</b>               | First minus last hemoglobin (gm/dL)                     |
|                                 | Normalized location of maximal hemoglobin (gm/dL)       |
| <b>Systolic blood pressure</b>  | Average absolute change systolic blood pressure         |
|                                 | Average of last 3 systolic blood pressure               |
|                                 | Average systolic blood pressure                         |
|                                 | Maximal systolic blood pressure                         |
|                                 | Standard deviation of systolic blood pressure           |
| <b>Diastolic blood pressure</b> | Average of last 3 diastolic blood pressure              |
|                                 | First minus last diastolic blood pressure               |
|                                 | Maximal diastolic blood pressure                        |
|                                 | Normalized location of maximal diastolic blood pressure |
|                                 | Number of measurement diastolic blood pressure          |
|                                 | Standard deviation of diastolic blood pressure          |
| <b>Potassium</b>                | Average absolute change potassium (mmol/L)              |
|                                 | Average potassium (mmol/L)                              |
|                                 | Normalized location of minimal potassium (mmol/L)       |
| <b>Respiratory rate</b>         | Normalized location of minimal respiratory rate         |
| <b>Weight</b>                   | Average weight                                          |
|                                 | First minus last weight                                 |
|                                 | Maximal weight                                          |
|                                 | Minimal weight                                          |
|                                 | Number of measurement weight                            |

|                         |                                                                                |
|-------------------------|--------------------------------------------------------------------------------|
| <b>Medication order</b> | Number of medication order: antihypertensives, angiotensin receptor antagonist |
|                         | Number of medication order: digitalis glycosides                               |
| <b>Procedure</b>        | Number of procedure: BIPAP                                                     |
|                         | Number of procedure: hemodialysis                                              |
|                         | Number of procedure: mechanical ventilation                                    |
|                         | Number of procedure: patient may use own CPAP                                  |
