# Supplementary material for: Readmission Risk Trajectories for Patients With Heart Failure Using a Dynamic Prediction Approach: Retrospective Study
Source: PubMed Central journal article supplement (PMC6781727; doi:10.2196/14756), 2019-09-16

Summary of discriminative predictors for each patient group.

| Predictor                         | Boxplot |
|-----------------------------------|---------|
| <b>Diastolic blood pressure</b>   |         |
| Standard deviation (mmHg)         |         |
| First value-last value (mmHg)     |         |
| Maximal value (mmHg):             |         |
| Average value (mmHg)              |         |
| Average absolute change (mmHg)    |         |
| <b>Potassium</b>                  |         |
| Normalized index of minimal value |         |
| First value-last value (mmol/L)   |         |

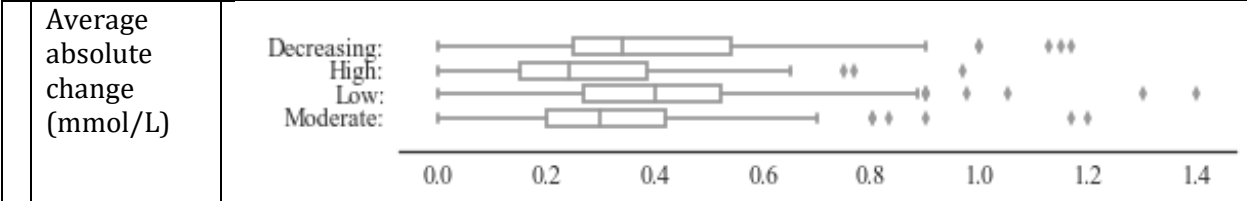

**Sodium**

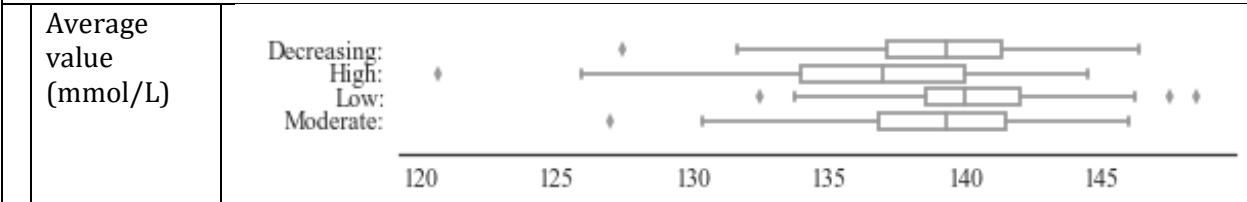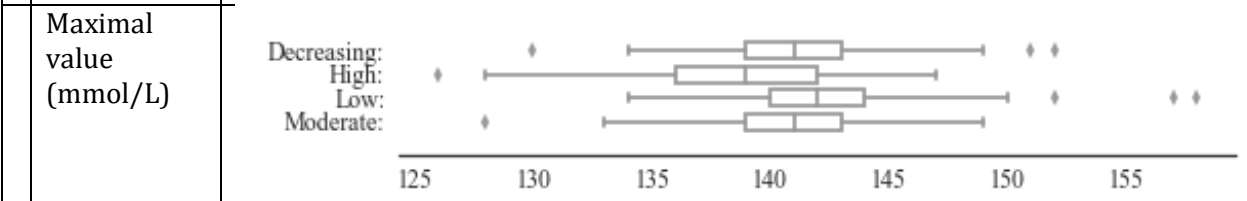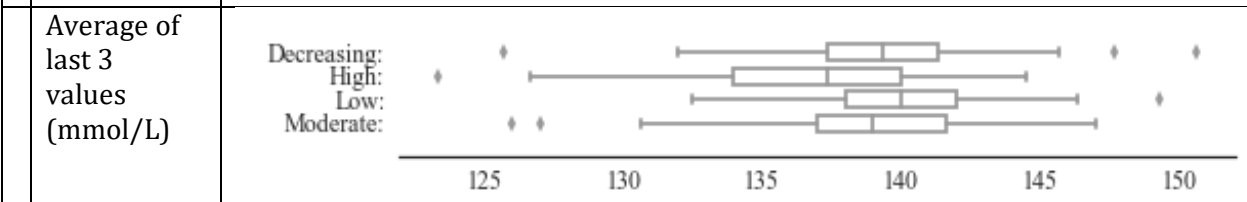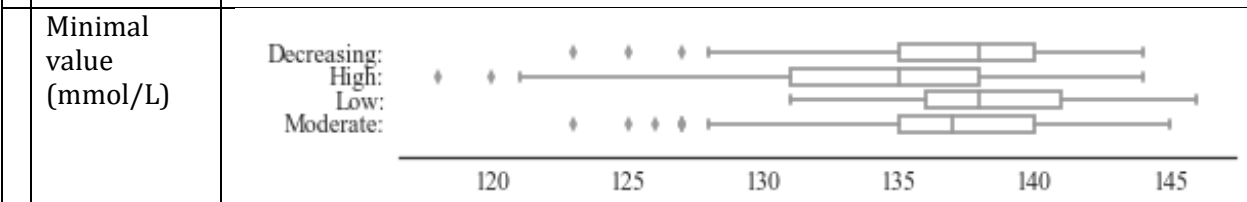

**Hemoglobin**

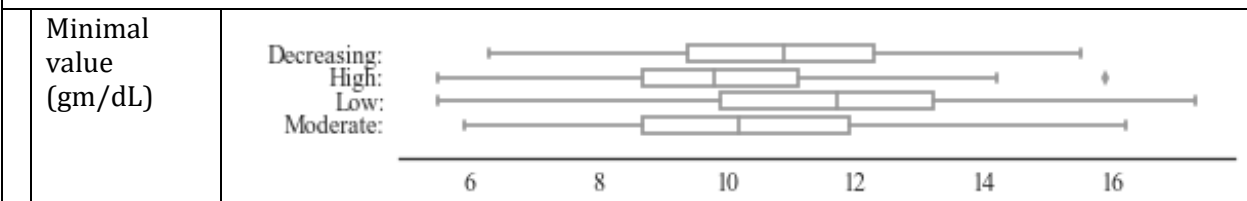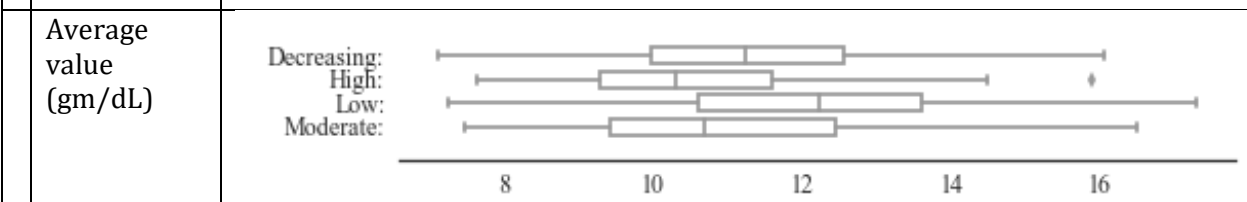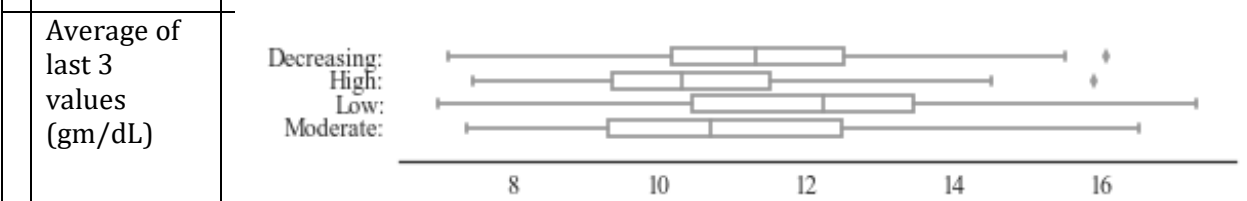

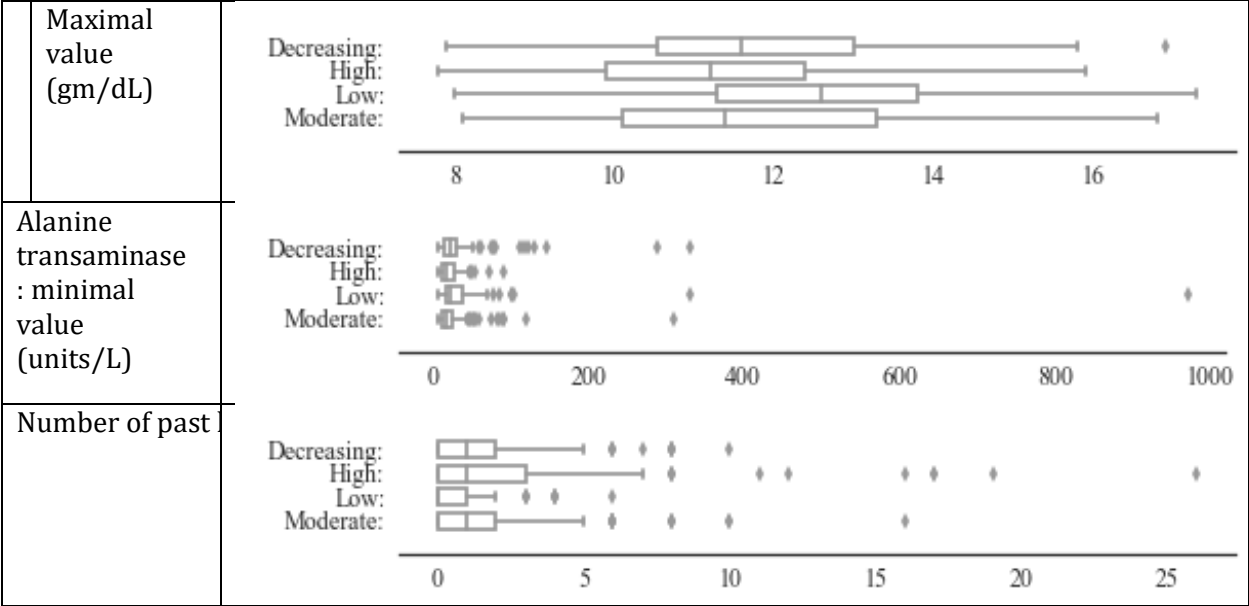

Supplement: medinform_v7i3e14756_app4.pdf [file medinform_v7i3e14756_app4.pdf]
